1 **Convalescence from prototype SARS-CoV-2 protects Syrian hamsters from**  
2 **disease caused by the Omicron variant**

3

4 **Authors:**

5 Kathryn A. Ryan, Robert J. Watson, Kevin R. Bewley, Christopher Burton, Oliver  
6 Carnell, Breeze E. Cavell, Amy Challis, Naomi S. Coombes, Kirsty Emery, Rachel  
7 Fell, Susan A. Fotheringham, Karen E. Gooch, Kathryn Gowan, Alastair Handley,  
8 Debbie J. Harris, Richard Humphreys, Rachel Johnson, Daniel Knott, Sian Lister,  
9 Daniel Morley, Didier Ngabo, Karen L. Osman, Jemma Paterson, Elizabeth J. Penn,  
10 Steven T. Pullan, Kevin S. Richards, Imam Shaik, Sian Summers, Stephen R.  
11 Thomas, Thomas Weldon, Nathan R. Wiblin, Richard Vipond, Bassam Hallis, Simon  
12 G. P. Funnell and Yper Hall\*.

13

14 **UK Health Security Agency, Porton Down, Salisbury, Wiltshire, United Kingdom**  
15 **SP4 0JG.**

16

17 **\*Corresponding author**

18 Yper Hall

19

20 **Keywords: SARS-CoV-2, Omicron variant, Syrian hamster, animal model,**  
21 **coronavirus**

22

23

24 **Abstract**

25 The mutation profile of the SARS-CoV-2 Omicron variant poses a concern for naturally  
26 acquired and vaccine-induced immunity. We investigated the ability of prior infection  
27 with an early SARS-CoV-2, 99.99% identical to Wuhan-Hu-1, to protect against  
28 disease caused by the Omicron variant. We established that infection with Omicron  
29 in naïve Syrian hamsters resulted in a less severe disease than a comparable dose of  
30 prototype SARS-CoV-2 (Australia/VIC01/2020), with fewer clinical signs and less  
31 weight loss. We present data to show that these clinical observations were almost  
32 absent in convalescent hamsters challenged with the same dose of Omicron 50 days  
33 after an initial infection with Australia/VIC01/2020. The data provide evidence for  
34 immunity raised against prototype SARS-CoV-2 being protective against Omicron in  
35 the Syrian hamster model. Further investigation is required to conclusively determine  
36 whether Omicron is less pathogenic in Syrian hamsters and whether this is predictive  
37 of pathogenicity in humans.

38

39

40

41 **Word count: 146**

## 42 **Introduction**

43 Since the beginning of the Coronavirus disease 2019 (COVID-19) pandemic, the  
44 causative agent SARS-CoV-2 has been subject to intense genomic surveillance. This  
45 global effort monitors for adaptations particularly those giving rise to increased  
46 infectivity and/or transmissibility, as well as variants with the potential to circumvent  
47 naturally acquired or vaccine-induced immunity. On 26 November 2021, WHO  
48 designated the variant B.1.1.529 a variant of concern, named Omicron. This variant  
49 has a large number of mutations in the spike protein<sup>1</sup> which may have an impact on  
50 vaccine induced protection, the spike protein being the antigenic component in the  
51 majority of approved vaccines.

52

53 Several animal models of SARS-CoV-2 were rapidly developed and these included  
54 the ferret<sup>2-9</sup> and non-human primate<sup>10-13</sup> models of disease. Both of these models have  
55 been used effectively for pre-clinical evaluation of vaccines and therapeutics, however,  
56 both models present with asymptomatic to mild disease; primary endpoints for  
57 countermeasure testing are viral shedding, viral loads in the upper and lower  
58 respiratory tract and lung pathology, with the lung pathology observed in the NHP  
59 model being consistent with the mild, resolving disease seen in healthy human adults.  
60 Whilst the ferret model remains useful, and the NHP model essential for  
61 immunogenicity, safety and efficacy testing in a system more similar to humans, the  
62 Golden Syrian hamster model has since become well established as a model of  
63 COVID-19 exhibiting signs of severe clinical disease<sup>14</sup>.

64

65 SARS-CoV-2 uses cellular surface protein angiotensin-converting enzyme 2 (ACE2)  
66 to bind and enter cells and *in silico* studies predicted that the SARS-CoV-2 spike  
67 protein receptor binding domain would bind strongly to hamster ACE2, second only to  
68 humans and non-human primates<sup>15</sup>. Clinical signs of infection in the hamster model  
69 include weight loss, ruffled fur and laboured breathing, while pathological analyses  
70 reveal moderate to severe inflammatory lesions within the upper and lower respiratory  
71 tract<sup>16-21</sup>. These readouts offer improved discriminatory power for assessment of  
72 countermeasure efficacy and virus pathogenicity and have been effectively applied to  
73 the assessment of therapeutics<sup>22-24</sup>, vaccines<sup>25-27</sup> and variants of concern<sup>28-32</sup>.

74

75 In our studies, SARS-CoV-2 variants of concern (VOC) or variants under investigation  
76 (VUI), have been initially assessed for escape from neutralisation and then, if found to  
77 warrant further investigation, assessed for virulence in the hamster model of infection.  
78 These *in vivo* studies specifically investigated pathogenicity and the ability of  
79 convalescent immunity against prototype SARS-CoV-2, or variants, to cross protect  
80 against re-infection with the selected VOCs or VUIs<sup>33</sup>. In our re-challenge  
81 experiments, our analysis of circulating antibodies 28 days after intranasal infection of  
82 naïve hamsters (the time initially selected for re-challenge) suggested optimisation  
83 was needed to increase the predictive value of the model to assess cross protective  
84 immunity breakthrough. In humans, naturally acquired and vaccine-elicited antibody  
85 responses decay over time<sup>34</sup> and so re-challenge studies must consider durability of  
86 the response if they are to be informative.

87

88 A dose-down experiment was initiated to assess the impact of infection with a range  
89 of lower doses of SARS-CoV-2 and to test for waning immunity over time, with a view  
90 to performing homologous re-challenge at an optimised timepoint. During the early  
91 stages of this experiment, the Omicron variant emerged and so the opportunity was  
92 taken to test for cross-protection between a prototype SARS-CoV-2,  
93 Australia/VIC01/2020, and this latest VOC. SARS-CoV-2 Australia/VIC01/2020 was  
94 isolated in January 2020 and has greater than 99.99% sequence identity to the  
95 Wuhan-Hu-1 reference genome (GenBank: MN908947.3)<sup>35</sup>.

96

97

98

99

100

101

102

103

104

105

106

107

108

## 109 **Results**

110

111 **Study Design.** Hamsters (n = 6 per group with an equal male/female ratio) were  
112 challenged intranasally with Australia/VIC01/2020<sup>35</sup> SARS-CoV-2 (VIC01), in a 200 µL  
113 volume at four different titres to achieve a range of target doses: 5E+04, 5E+03, 5E+02  
114 and 1E+02 PFU. All of the challenged hamsters were bled (300 µL gingival bleed) at  
115 baseline, 20 and 41 days post challenge to enable measurement of the humoral  
116 immune response. At 50 days following the initial VIC01 challenge, a re-challenge with  
117 either VIC01 or Omicron was performed on 3 animals from each VIC01 convalescent  
118 group. (**Table 1**), providing a total of 12 VIC01 re-challenged hamsters and 12  
119 Omicron re-challenged hamsters. Two naïve, age-matched control groups were  
120 included in this study; six naïve hamsters were challenged with VIC01 (3.10E+03 FFU)  
121 and eleven naïve hamsters were challenged with Omicron (8.18E+03 FFU), this  
122 challenge was prepared in parallel with the re-challenge and used the same inocula.  
123 All animals were culled 7 days later, except for a proportion of the Omicron control  
124 group where 5 animals were allowed to continue to be monitored for full recovery.  
125 Challenge inocula were back-titrated by foci forming assay on the day of challenge to  
126 confirm doses. Back titration of the challenge stocks confirmed that comparable doses  
127 of VIC01 and Omicron were administered to the re-challenged groups and to naïve  
128 control groups challenged in parallel.

129

130 **Decreasing doses of VIC01 produce a less severe disease in hamsters.** Back  
131 titration of the challenge material by plaque assay confirmed that the intended doses  
132 were given, with groups receiving 7.20E+04, 4.60E+02, 3.67E+01 or 2.00E+00 PFU.

133 Consistent with the *in vitro* titrations of the challenge inocula, manifestation of infection  
134 in challenged hamsters provided evidence for a dose-dependent effect. The greatest  
135 percentage weight loss from baseline was seen in hamsters infected with the highest  
136 target dose of VIC01 ( $5E+04$ ), with the groups receiving sequentially less virus  
137 experiencing less weight loss (**Fig. 1a**). Hamsters challenged with the two lower target  
138 doses,  $5E+02$  and  $1E+01$ , experienced significantly less overall weight loss compared  
139 to those receiving a target dose of  $5E+04$  ( $P=0.0146$  and  $P=0.0058$ , respectively). The  
140 peak day of mean weight loss for all groups was 7 days post challenge, after which all  
141 groups recovered towards baseline levels.

142

143 Clinical signs of infection excluding weight loss were scored using an arbitrary scale  
144 weighted for clinical signs perceived to be of greater significance (**Table 2**), in order to  
145 permit comparison between groups. The greatest clinical signs score (**Fig. 1b**) was  
146 observed in the group given the highest target dose of VIC01 ( $5E+04$ ). The clinical  
147 signs score decreased dose-dependently, with the group receiving  $1E+02$  of VIC01  
148 having the lowest score. A decreasing dose of VIC01 did not appear to have an effect  
149 on viral shedding from the upper respiratory tract (URT) (**Fig. 1c**). There were no  
150 significant differences between the amount of total viral RNA shed between groups.  
151 By day 14 post challenge, viral RNA shed from the URT of hamsters was below the  
152 quantifiable detection levels of our assay for the majority of hamsters irrespective of  
153 initial dose of challenge virus.

154

155 **Longitudinal Immune Response to decreasing doses of VIC01.** In general, the  
156 humoral longitudinal immunity assessed in hamsters at day 20 and day 41 post

157 challenge were all high and comparable to each other irrespective of dose. The  
158 neutralising antibody titres (ND<sub>50</sub>) measured in hamsters were very similar at both  
159 timepoints post challenge (**Fig. 1d**), with one exception. The group of hamsters that  
160 received a target dose of 5E+02 had significantly less circulating neutralising  
161 antibodies compared to the two higher target dose groups (P=0.0143 and P=0.0089  
162 for groups 5E+04 and 5E+03, respectively).

163

164 Binding antibody titres were similar across groups. The presence of SARS-CoV-2  
165 RBD-specific IgG binding antibodies (**Fig. 1e**) in sera increased from baseline for all  
166 challenged groups by day 20. All groups showed a decrease in titres by day 41,  
167 although this was not significant. At day 20, hamsters challenged with target dose of  
168 5E+02 were found to have significantly more SARS-CoV-2 RBD-specific IgG binding  
169 antibodies compared to the group that received 5E+04 (P=0.0465). No other  
170 differences between groups were found. A similar pattern was identified when sera  
171 were analysed for SARS-CoV-2 spike-specific IgG binding antibodies (**Fig. 1f**). Only  
172 hamsters that received a target dose of 5E+04 showed a significant decrease  
173 (P=0.0011) in SARS-CoV-2 spike-specific IgG binding antibodies from day 20 to 41.  
174 SARS-CoV-2 spike-specific IgG binding antibodies appeared to increase at day 41  
175 post challenge in the group administered a target dose of 1E+02 VIC01, but this was  
176 not statistically significant.

177

178 Assessment of antibody-dependent complement deposition (**Fig.1g**) showed a similar  
179 response to that seen with anti-spike IgG, anti-RBD IgG and neutralisation titres at day  
180 20 and day 41 post challenge; complement deposition was equally high regardless of



181 the target dose administered. The only significant decrease seen from day 20 to day  
182 41 was in hamsters that received a target dose of  $5E+04$  ( $P=0.0191$ ).

183 Overall, assessment of longitudinal antibody responses to decreasing doses of VIC01  
184 shows that all responses are sustained between doses with no convincing  
185 discrimination amongst groups at day 20 or day 41 post challenge. This is in contrast  
186 to differences observed in weight loss and other clinical signs.

187

188 **Omicron variant produces milder clinical signs of infection in hamsters**  
189 **compared to VIC01.** Two groups of control hamsters were challenged with a high  
190 dose of either VIC01 ( $n = 6$ ) or Omicron ( $n = 11$ ) and monitored for clinical signs of  
191 infection for seven days post challenge. On average, a higher percentage of weight  
192 loss from baseline (day 0) was observed in hamsters infected with VIC01 compared  
193 to hamsters infected with the Omicron variant (**Fig. 2a**). Omicron challenged  
194 hamsters appeared not to experience weight loss below baseline until day 6; however,  
195 there was a failure for these hamsters to gain weight from day 2 post challenge. The  
196 total amount of weight loss seen in VIC01 infected hamsters was significantly greater  
197 ( $P=0.0007$ ) than that seen in Omicron infected hamsters. A greater number of clinical  
198 signs were recorded in hamsters challenged with VIC01 when compared to the  
199 Omicron variant (**Fig. 2b**). Clinical signs seen in hamsters challenged with VIC01 and  
200 Omicron were similar with laboured breathing (occasional catch or skip in breathing  
201 rate) and ruffled coat being the most frequently scored observations; the occurrence  
202 of these signs was higher in hamsters receiving VIC01. Monitoring of temperature  
203 (**Fig. 2c**) showed that VIC01 hamsters saw a reduction in mean group temperatures  
204 once challenged. This did not occur in hamsters challenged with Omicron. Shedding

205 of total viral RNA from the URT appeared to be the same irrespective of challenge  
206 virus (**Fig. 2d**) at day 2 and day 4 post challenge. At day 6 and 7 post challenge  
207 hamsters challenged with Omicron were shedding significantly less ( $P=0.0136$  and  
208  $P=0.0012$ , respectively) total viral RNA in their URT compared to VIC01 challenged  
209 hamsters.

210

211 **Re-challenge of hamsters with high dose VIC01 or Omicron variant results in**  
212 **absence of clinical disease and rapid clearance of virus.** At 50 days post-  
213 challenge, 24 previously infected (convalescent) hamsters were re-challenged.  
214 Twelve hamsters were re-challenged intranasally with VIC01 ( $3.1E+10^3$  FFU) and 12  
215 with Omicron ( $8.18E+10^3$  FFU). Following re-challenge, both groups of hamsters  
216 continued to gain weight above baseline (**Fig 3a**). The majority of hamsters remained  
217 healthy (**Fig. 3b**) following re-challenge with only four hamsters (two from each group)  
218 experiencing clinical signs. Three of these hamsters were previously administered the  
219 high target dose of  $5E+04$  and one administered the low target dose of  $1E+02$ .  
220 Hamsters in the VIC01 and Omicron groups were recorded as being ruffled with one  
221 instance in the VIC01 group of laboured breathing 1 (see **Table 2**). These clinical  
222 signs were transient, and all hamsters were healthy by the following observational  
223 timepoint. The average temperature (**Fig. 3c**) recorded in re-challenged hamsters  
224 was comparable between those receiving Omicron and VIC01 and no temperature  
225 drop or disruption of diurnal cycle was noted in hamsters post re-challenge. Shedding  
226 of viral RNA from the throat swabs saw rapid clearance of total viral RNA by day 4 in  
227 the Omicron group and by day 6 in the VIC01 challenge group (**Fig. 3d**). Omicron re-  
228 challenged hamsters were shown to be shedding significantly less ( $P < 0.0001$ ) viral  
229 RNA from their URT by day 4 compared to VIC01 re-challenge hamsters.

230 No differences in clinical signs (weight, score or temperature) or virus shedding was  
231 seen between convalescent hamsters initially challenged with decreasing doses of  
232 VIC01.

233

234

235

236

## 237 **Discussion**

238

239 Two important questions arising from the emergence of variants of SARS-CoV-2 are  
240 whether they will circumvent naturally acquired immunity or that induced by  
241 vaccines<sup>36,37</sup>. During the course of the pandemic, the amino acid sequence of  
242 important viral epitopes of VOCs and VUIs against which previous naturally acquired  
243 or vaccination-induced immunity has been raised has changed<sup>38</sup>. As of December  
244 2021, all approved vaccines are designed according to the sequence of the prototype  
245 virus. To address the impact of arising variants, *in vitro* assessment of antibodies in  
246 live virus neutralisation assays has proven an effective predictor of homologous versus  
247 heterologous protection<sup>39-42</sup>. Our initial *in vitro* assessment of a convalescent panel  
248 collected during the pre-alpha era suggested that for Omicron, this was not the case<sup>33</sup>,  
249 i.e. cross neutralisation was worse affected. However, *in vitro* antibody assessment  
250 does not take into account the impact of cellular immunity on protection and so animal  
251 models remain an important tool in the pandemic response to SARS-CoV-2.

252

253 The Syrian hamster model has offered excellent discriminatory power for assessing  
254 interventions<sup>24</sup>, however, optimisation is required for informative cross-protection  
255 studies. The neutralising antibody titres reported here, for serum taken at up to 41  
256 days post-challenge, are higher than comparable data for convalescent and  
257 vaccinated humans<sup>43</sup>. Here we aimed to optimise the hamster re-challenge model by  
258 infecting animals with a series of sequentially lower doses of prototype SARS-CoV-2  
259 (VIC01) and measuring humoral immunity over time. Ultimately, this approach might  
260 identify a more suitable initial challenge dose and timepoint for re-challenge against

261 which to investigate cross protection between SARS-CoV-2 variants. Our results  
262 demonstrate that at 20 and 41 days post-infection, neutralising antibody titres  
263 remained high irrespective of the infectious dose administered. As such, re-challenge  
264 of these hamsters at 50 days post-infection occurred against a high circulating  
265 antibody level and, it might be assumed, a strong cellular immune component, the  
266 latter only being measured after re-challenge at termination.

267

268 To properly investigate protection against re-challenge with VIC01 or Omicron, control  
269 groups of naïve hamsters were challenged with each virus in parallel. The results  
270 provide evidence to confirm that Syrian hamsters are susceptible to experimental,  
271 intranasal infection with a low passage isolate of the SARS-CoV-2 Omicron variant.  
272 However, infection with  $8.18E+10^3$  FFU in a 200  $\mu$ L volume appeared to produce  
273 reduced clinical signs, delayed and reduced weight loss when compared to hamsters  
274 challenged with the ancestral virus, VIC01, at a comparable dose. This outcome  
275 appears to reflect the clinical description of human infection with this new variant of  
276 concern<sup>44,45</sup>. Despite these clear differences in clinical signs of infection in hamsters,  
277 shedding of virus in the upper respiratory tract was comparable for both the VIC01 and  
278 Omicron groups in the hamster model.

279

280 Further investigation, including histopathological assessment of the upper and lower  
281 respiratory tract, is required to conclusively determine whether Omicron is less  
282 pathogenic in Syrian hamsters. Complementary reports may also inform whether the  
283 mutations in the receptor binding domain of Omicron have disproportionately affected  
284 virus binding to human versus hamster ACE2.

285

286 In Syrian hamsters previously infected with different doses of prototype SARS-CoV-2,  
287 we have shown that reinfection with either VIC01 or Omicron does not induce the  
288 outward markers of diseases that are evident following the infection of naïve hamsters.  
289 Thus, the immunity raised against the sequence and phenotypic composition of whole,  
290 prototype SARS-CoV-2 virus is sufficient to confer solid protection against a variant  
291 with the mutation profile of Omicron<sup>46,47</sup>.

292

293

294

295

296

297

298

299

300

301

302

303

304

## 305 **Materials & Methods**

306

307 **Viruses and Cells.** SARS-CoV-2 Australia/VIC01/2020<sup>35</sup> was generously provided by  
308 The Doherty Institute, Melbourne, Australia at P1 after primary growth in Vero/hSLAM  
309 cells and subsequently passaged twice at UKHSA Porton in Vero/hSLAM cells  
310 [ECACC 04091501]. Infection of cells was with ~0.0005 MOI of virus and harvested at  
311 day 4 by dissociation of the remaining attached cells by gentle rocking with sterile  
312 5 mm borosilicate beads followed by clarification by centrifugation at 1000 × g for  
313 10 min. Whole genome sequencing was performed, on the P3 challenge stock, using  
314 SISPA amplification on both Nanopore and Illumina technologies as described  
315 previously<sup>48</sup>. Virus titre of the VIC01 challenge stocks was determined by plaque assay  
316 on Vero/E6 cells [ECACC 85020206]. Cell lines were obtained from the European  
317 Collection of Authenticated Cell Cultures (ECACC) UKHSA, Porton Down, UK. Cell  
318 cultures were maintained at 37°C in MEM (Life Technologies, USA) supplemented  
319 with 10% foetal bovine serum (Sigma, UK) and 25 mM HEPES (Gibco), 2mM L-  
320 Glutamine (Gibco), 1x Non-Essential Amino Acids Solution (Gibco). In addition,  
321 Vero/hSLAM cultures were supplemented with 0.4 mg/ml of geneticin (Invitrogen) to  
322 maintain the expression plasmid.

323

324 SARS-CoV-2 lineage B.1.1.529 (Omicron) was isolated at UKHSA, Porton Down, UK,  
325 from a nasopharyngeal swab taken from a UK patient with no known travel history  
326 outside the UK, however, was identified as a close contact of a confirmed Omicron  
327 case. The clinical swab was used to inoculate Vero/hSLAM cells [ECACC 04091501]  
328 and harvested day 4 by freeze thaw and dissociation of the remaining attached cells

329 by gentle rocking with sterile 3 mm borosilicate beads, followed by clarification by  
330 centrifugation at  $1690 \times g$  for 10 min. Whole genome sequencing was performed, on  
331 the P1 stock, using SISPA amplification on both Nanopore and Illumina technologies  
332 as described previously<sup>48</sup>. Virus titre of the P1 stock was determined by focus forming  
333 assay on Vero/E6 cells [ECACC 85020206]. A P2 challenge stock was produced by  
334 infection of Vero/hSLAM cells with  $\sim 0.0005$  MOI of P1 virus stock and harvested at 80  
335 h post-infection, as described previously. The P2 challenge stock (HCM/V/127) was  
336 sequenced and titred, as described previously (GenBank: OM003685). Cell lines were  
337 obtained from the European Collection of Authenticated Cell Cultures (ECACC)  
338 UKHSA, Porton Down, UK. Cell cultures were maintained at 37°C in MEM,  
339 GlutaMAX™ (Life Technologies) supplemented with 10% foetal bovine serum (Origin  
340 USA, Sigma Life Sciences, UK) and 25 mM HEPES (Gibco), 1x Non-Essential Amino  
341 Acids Solution (Gibco). In addition, Vero/hSLAM cultures were supplemented with 0.4  
342 mg/ml of geneticin (Invitrogen) to maintain stable integration of pCAG-hSLAM and  
343 expression of the human signalling lymphocytic activation molecule (hSLAM).

344

345

346 **Focus forming assay (FFA).** The virus titre for Omicron was determined by focus  
347 forming assay on Vero/E6 cells [ECACC 85020206]. 96-well plates were seeded with  
348  $2.5 \times 10^4$  cells/well the day prior to infection then washed twice with Dulbecco's PBS  
349 (DPBS). Ten-fold serial dilutions ( $1 \times 10^{-1}$  to  $1 \times 10^{-6}$ ) of virus stocks were prepared in  
350 MEM (supplemented with 25 mM HEPES (Gibco), 2mM L-Glutamine (Gibco), 1x Non-  
351 Essential Amino Acids Solution (Gibco)). 100µl virus inoculum was added per well in  
352 duplicate and incubated for 1 h at 37°C. Virus inoculum was removed and cells  
353 overlaid with MEM containing 1% carboxymethylcellulose (Sigma), 4% (v/v) heat-



354 inactivated foetal calf serum (FCS) (Sigma), 25 mM HEPES buffer (Gibco), 2mM L-  
355 Glutamine (Gibco), 1x Non-Essential Amino Acids Solution (Gibco). After incubation  
356 at 37°C for 26 h, cells were fixed overnight with 8% (w/v) formalin/PBS, washed with  
357 water and permeabilised with 0.2% (w/v) Triton X-100/PBS at room temperature for  
358 10 mins. Cells were washed with PBS, incubated with 0.3% hydrogen peroxide  
359 (Sigma) at room temperature for 20 mins and washed with PBS. Foci were stained  
360 with 50µl/well rabbit anti-nucleocapsid (Sino Biological, 40588-T62) diluted 1:1000 in  
361 0.2% (w/v) Triton X-100/PBS for 1 h at room temperature. Antibody dilutions were  
362 discarded, cells washed with PBS and incubated with 50µl/well goat anti-rabbit IgG  
363 HRP (Invitrogen, G-21234) diluted 1:4000 in 0.2% (w/v) Triton X-100/PBS for 1h at  
364 room temperature. Cells were washed with PBS and incubated with TrueBlue  
365 peroxidase substrate (SeraCare, 5510-0030) for 10 min at room temperature then  
366 washed with water. Infectious foci were counted with an ImmunoSpot® S6 Ultra-V  
367 analyser with BioSpot counting module (Cellular Technologies Europe). Titre  
368 (FFU/ml) was determined by the following formula: Titre (FFU/ml) = No. of foci /  
369 (Dilution factor x 0.1).

370

371

372 **Animals.** Forty-one healthy, Golden Syrian hamsters (*Mesocricetus auratus*), aged  
373 20-22 weeks, were obtained from a UK Home Office accredited supplier (Envigo RMS  
374 UK). Animals were housed individually at Advisory Committee on Dangerous  
375 Pathogens (ACDP) containment level 3. Cages met with the UK Home Office *Code*  
376 *of Practice for the Housing and Care of Animals Bred, Supplied or Used for Scientific*  
377 *Procedures* (December 2014). Access to food and water was *ad libitum* and  
378 environmental enrichment was provided. All experimental work was conducted under  
379 the authority of a UK Home Office approved project licence that had been subject to

380 local ethical review at UKHSA Porton Down by the Animal Welfare and Ethical Review  
381 Body (AWERB) as required by the *Home Office Animals (Scientific Procedures) Act*  
382 *1986*.

383

384 **Experimental Design.** Before the start of the experiment, animals were randomly  
385 assigned to challenge groups to minimise bias. The weight distribution of the animals  
386 was tested to ensure there was no statistically significant difference between groups  
387 (one-way ANOVA,  $p > 0.05$ ). An identifier chip (Bio-Thermo Identichip, Animalcare Ltd,  
388 UK) was inserted subcutaneously into each animal. Prior to challenge animals were  
389 sedated by isoflurane. Challenge virus was delivered by intranasal instillation (200  $\mu$ L  
390 total, 100  $\mu$ L per nostril) diluted in phosphate buffered saline (PBS).

391

392 Four different target doses of VIC01 were delivered to four groups ( $n=6$ ) of hamsters:  
393  $5E+04$ ,  $5E+03$ ,  $5E+02$  and  $1E+02$  PFU. Hamsters were throat swabbed at day 2, 4,  
394 6, 8, 10 and 14 post challenge. Under sedation, hamsters underwent gingival bleeds  
395 (300  $\mu$ L) at baseline and day 20 and 41 post challenge for assessment of humoral  
396 immunity.

397

398 On day 50 post challenge, hamsters were split into two groups ( $n=12$ ) and re-  
399 challenged with either VIC01 ( $3.10E+03$  FFU) or Omicron ( $8.18E+03$  FFU). A control  
400 group of naïve, age-matched hamsters ( $n = 6$ ) was challenged with VIC01 ( $3.10E+03$   
401 FFU). A further control group of hamsters ( $n = 11$ ) of the same age were challenged  
402 with Omicron ( $8.18E+03$  FFU). All hamsters were monitored for weight and clinical  
403 signs. Throat swabs were taken at day 2, 4, 6 and 7 following re-challenge.

404

405 **Clinical observations.** Hamsters were monitored for temperature via Bio-Thermo  
406 Identichip and for clinical signs of disease twice daily (approximately 8 h apart). Clinical  
407 signs of disease were assigned a score based upon the following criteria (score in  
408 brackets); healthy (0), lethargy (1), behavioural change (1), sunken eyes (2), ruffled  
409 (2), wasp waited (3), dehydrated (3), arched (3), coughing (3), laboured breathing 1 –  
410 occasional catch or skip in breathing rate (5) and laboured breathing 2 - abdominal  
411 effort with breathing difficulties (7). Animals were weighed at the same time of each  
412 day until euthanasia.

413

414 **Necropsy Procedures.** Hamsters were given an anaesthetic overdose (sodium  
415 pentobarbitone Dolelethal, Vetquinol UK Ltd, 140 mg/kg) via intraperitoneal injection  
416 and exsanguination was effected via cardiac puncture. A necropsy was performed  
417 immediately after confirmation of death. Samples were collected for analyses not  
418 reported here.

419

420 **RNA Extraction.** Throat swabs were inactivated in AVL plus ethanol and RNA was  
421 isolated. Downstream extraction was performed using the BioSprint™96 One-For-All  
422 vet kit (Indical) and Kingfisher Flex platform as per manufacturer's instructions.

423

424 **Quantification of Viral RNA by RT-qPCR.** Reverse transcription-quantitative  
425 polymerase chain reaction (RT-qPCR) targeting a region of the SARS-CoV-2  
426 nucleocapsid (N) gene was used to determine viral loads and was performed using  
427 TaqPath™ 1-Step RT-qPCR Master Mix, CG (Applied Biosystems™), 2019-nCoV

428 CDC RUO Kit (Integrated DNA Technologies) and QuantStudio™ 7 Flex Real-Time  
429 PCR System. Sequences of the N1 primers and probe were: 2019-nCoV\_N1-forward,  
430 5' GACCCCAAATCAGCGAAAT 3'; 2019-nCoV\_N1-reverse, 5'  
431 TCTGGTTACTGCCAGTTGAATCTG 3'; 2019-nCoV-N1-probe, 5' FAM-  
432 ACCCCGCATTACGTTTGGTGGACC-BHQ1 3'. The cycling conditions were: 25 °C  
433 for 2 min, 50 °C for 15 min, 95 °C for 2 min, followed by 45 cycles of 95 °C for 3 s, 55  
434 °C for 30 s. The quantification standard was *in vitro* transcribed RNA of the SARS-  
435 CoV-2 N ORF (accession number NC\_045512.2) with quantification between  $1 \times 10^1$   
436 and  $1 \times 10^6$  copies/ $\mu$ L. Positive swab and fluid samples detected below the limit of  
437 quantification (LLOQ) of 12,857 copies/mL, were assigned the value of 5 copies/ $\mu$ L,  
438 this equates to 6,429 copies/mL, whilst undetected samples were assigned the value  
439 of  $< 2.3$  copies/ $\mu$ L, equivalent to the assay's lower limit of detection (LLOD) which  
440 equates to 2957 copies/mL.

441

442 **SARS-CoV-2 focus reduction neutralisation test<sup>49</sup>**. Test sera were heat-inactivated  
443 at 56°C for 30 minutes to destroy any complement activity and serially diluted 1:2 in  
444 cell culture media containing 1% foetal calf serum (Sigma). Virus was diluted to give  
445 100-250 foci in the virus-only control and then added to the serum dilutions before  
446 incubation for 1 h at 37°C. Serum/virus mixtures were then incubated on a VeroE6 cell  
447 monolayer (ECACC) for 1 h at 37°C. The virus/antibody mixture was replaced with an  
448 overly media containing 1% CMC (Sigma) before incubation for 24 h at 37°C. Cells  
449 were fixed by adding 20% formalin/PBS solution. Residual endogenous peroxidase  
450 activity was removed using 0.3% hydrogen peroxide (Sigma). Cells were incubated  
451 for 1 h with primary/detection SARS-CoV-2 anti-RBD rabbit polyclonal antibody  
452 (Sinobiologicals) and then 1 h with secondary anti-rabbit HRP-conjugate antibody

453 (Invitrogen). Foci were visualised using TrueBlue™ Peroxidase Substrate (Sera Care)  
454 and counted using an ImmunoSpot S6 Ultra-V analyser and BioSpot software (CTL).  
455 The ND<sub>50</sub> output was the serum dilution that neutralised 50% of the foci forming virus.

456

457 **ELISA.** Recombinant SARS-CoV-2 Spike (S) and receptor binding domain (RBD)  
458 specific IgG responses were determined by ELISA. A full-length trimeric and stabilised  
459 version of the SARS-CoV-2 Spike protein was supplied by Lake Pharma (#46328).  
460 Recombinant SARS-CoV-2 (2019-nCoV) Spike RBD-His was supplied by  
461 SinoBiological (40592-V08H). High-binding 96-well plates (Nunc Maxisorp, 442404)  
462 were coated with 50 µL per well of 2 µg/mL Spike trimer or RBD in 1 x PBS (Fisher  
463 Scientific, 11510546) and incubated overnight at 4 °C. ELISA plates were washed in  
464 wash buffer (1 x PBS 0.05% Tween-20) and blocked with 5% Foetal Bovine Serum  
465 (FBS, Sigma, F9665) in 1 x PBS/0.1% Tween-20 for 1 h at room temperature. Serum  
466 collected from naïve animals, pre-challenge, had a starting dilution of 1:100 followed  
467 by 8 step two-fold serial dilutions. Post-challenge samples were inactivated in  
468 0.5% triton and had a starting dilution of 1:100 followed by 16 two-fold serial dilutions.  
469 Serial dilutions were performed in 10% FBS in 1 x PBS/0.1% Tween 20. After washing,  
470 50 µL per well of each serum dilution was added to the antigen-coated plate in  
471 duplicate and incubated for 2 h at room temperature. Following washing, anti-hamster  
472 IgG conjugated to HRP (Novus Biologics, NBP1-74892) was diluted 1: 3,000 in 10%  
473 FBS in 1 x PBS containing 0.1% Tween-20 and 100 µL per well was added to the  
474 plate. Plates were then incubated for 1 h at room temperature. After washing, 100 µL  
475 ready to use 3, 3',5 ,5'-Tetramethylbenzidine Liquid Substrate (Sigma-Aldrich, T4444)  
476 was applied to plates. After 5 minutes the development was stopped with 50 µL per  
477 well 1 M Hydrochloric acid (Fisher Chemical, J/4320/15) and the absorbance at

478 450 nm was read on a Multiskan FC Microplate Photometer (Thermo Scientific). Titres  
479 were determined by curve fitting data to a 4PL curve in GraphPad Prism 9 and  
480 accepting only data which produced an  $R^2$  value of  $>0.95$ . For each sample the titre  
481 was interpolated as the dilution point at which the fitted curve passed a specified  
482 absorbance value.

483

484 **Antibody-Dependent Complement Deposition (ADCD) Assay.** SPHERO carboxyl  
485 magnetic blue fluorescent beads (Spherotech, USA) were coupled with SARS-CoV-2  
486 whole spike protein (Lake Pharma, 46328) using a two-step sulpho-NHS/EDC  
487 process<sup>50</sup>. Spike protein was included at saturation levels and coupling confirmed by  
488 the binding of IgG from a COVID-19 convalescent donor known to have high levels of  
489 anti-spike protein IgG. Heat-inactivated NIBSC Anti-SARS-CoV-2 Antibody Diagnostic  
490 Calibrant (NIBSC, 20/162) at an initial 1:40 dilution (10  $\mu$ l sera into 30  $\mu$ l blocking buffer  
491 (BB; PBS, 2% BSA) followed by a 1:10 dilution into BB) with an assigned arbitrary  
492 unitage of 1000 U/ml was added in duplicate and serially diluted 2:3 in BB. Heat-  
493 inactivated test serum (3  $\mu$ l in duplicate) were added to 27  $\mu$ l BB and serially diluted  
494 1:3 in BB. This was followed by 20  $\mu$ l of SARS-CoV-2 spike protein-coated magnetic  
495 beads (50 beads per  $\mu$ l) to give a final 1:3 serial dilution range starting at 1:20. The  
496 serial dilution for NIBSC 20/162 standard started at 1:80. The mixture was incubated  
497 at 25°C for 30 min with shaking at 900 r.p.m. The beads were washed twice in 200  $\mu$ l  
498 wash buffer (BB+0.05% Tween-20), then resuspended in 50  $\mu$ l BB containing 12.5%  
499 IgG- and IgM-depleted human plasma<sup>51</sup> and incubated at 37°C for 15 min with shaking  
500 at 900 r.p.m. Beads were next washed twice with 200  $\mu$ l wash buffer and resuspended  
501 in 100  $\mu$ l FITC-conjugated rabbit anti-human C3c polyclonal antibody (Abcam) diluted  
502 1:500 in BB and incubated in the dark at 25°C for 20 min. After two more washes with

503 200 µl wash buffer, the samples were resuspended in 40 µl HBSS and analysed using  
504 an iQue Screener Plus® with iQue Forecyt® software (Sartorius, Germany). For each  
505 sample, a minimum of 100 beads were collected. Conjugated beads were gated based  
506 on forward scatter and side scatter and then further gated by APC fluorescence. The  
507 APC fluorescent-bead population was gated and measured for FITC Median  
508 Fluorescent Intensity, which represents deposition of C3b/iC3b. The NIBSC 20/162  
509 calibrant was plotted as a 4PL curve with  $1/Y^2$  weighting and the linear range  
510 calculated. The MFI from each sample was interpolated against the NIBSC 20/162  
511 4PL curve and the calculated concentration that hit the linear range was multiplied by  
512 the dilution factor to assign activity of the sera as Complement Activating Units (CAU).

513

## 514 **Data Availability**

515 The authors declare that the data supporting the findings of this study are available  
516 within the paper.

517

## 518 **Acknowledgements**

519 The authors gratefully acknowledge the support from the Biological Investigations  
520 Group at the UK Health Security Agency, Porton Down, United Kingdom. We also  
521 thank all elements of the UKHSA which enabled rapid access to clinical materials to  
522 acquire Omicron. The views expressed in this paper are those of the authors and not  
523 necessarily those of the funding body. This work was funded by the Coalition for  
524 Epidemic Preparedness Innovations' (CEPI) Agility Programme. The authors are  
525 grateful for critical review of the manuscript by Amy C. Shurtleff and William Dowling.

526

527 **Conflicts of Interest**

528 No conflicts of interest declared.

529

530

531

532

533

534



## 535 References

- 536 1 Cele, S. *et al.* SARS-CoV-2 Omicron has extensive but incomplete escape of Pfizer BNT162b2  
537 elicited neutralization and requires ACE2 for infection. *medRxiv*, 2021.2012.2008.21267417,  
538 doi:10.1101/2021.12.08.21267417 (2021).
- 539 2 Ryan, K. A. *et al.* Dose-dependent response to infection with SARS-CoV-2 in the ferret model  
540 and evidence of protective immunity. *Nat Commun* **12**, 81, doi:10.1038/s41467-020-20439-y  
541 (2021).
- 542 3 Everett, H. E. *et al.* Intranasal Infection of Ferrets with SARS-CoV-2 as a Model for  
543 Asymptomatic Human Infection. *Viruses* **13**, doi:10.3390/v13010113 (2021).
- 544 4 Kim, Y.-I. *et al.* Infection and Rapid Transmission of SARS-CoV-2 in Ferrets. *Cell Host & Microbe*,  
545 doi:<https://doi.org/10.1016/j.chom.2020.03.023> (2020).
- 546 5 Bewley, K. R. *et al.* Immunological and pathological outcomes of SARS-CoV-2 challenge after  
547 formalin-inactivated vaccine immunisation of ferrets and rhesus macaques.  
548 2020.2012.2021.423746, doi:10.1101/2020.12.21.423746 %J bioRxiv (2020).
- 549 6 Shi, J. *et al.* Susceptibility of ferrets, cats, dogs, and other domesticated animals to SARS-  
550 coronavirus 2. *Science*, eabb7015, doi:10.1126/science.abb7015 (2020).
- 551 7 Conforti, A. *et al.* COVID-eVax, an electroporated DNA vaccine candidate encoding the SARS-  
552 CoV-2 RBD, elicits protective responses in animal models. *Molecular therapy : the journal of*  
553 *the American Society of Gene Therapy*, doi:10.1016/j.ymthe.2021.09.011 (2021).
- 554 8 Ryan, K. A. *et al.* Sequential delivery of LAIV and SARS-CoV-2 in the ferret model can reduce  
555 SARS-CoV-2 shedding and does not result in enhanced lung pathology. *J Infect Dis*,  
556 doi:10.1093/infdis/jiab594 (2021).
- 557 9 Proud, P. C. *et al.* Prophylactic intranasal administration of a TLR2/6 agonist reduces upper  
558 respiratory tract viral shedding in a SARS-CoV-2 challenge ferret model. *EBioMedicine* **63**,  
559 103153-103153, doi:10.1016/j.ebiom.2020.103153 (2021).
- 560 10 Lambe, T. *et al.* ChAdOx1 nCoV-19 protection against SARS-CoV-2 in rhesus macaque and  
561 ferret challenge models. *Communications biology* **4**, 915, doi:10.1038/s42003-021-02443-0  
562 (2021).
- 563 11 Salguero, F. J. *et al.* Comparison of rhesus and cynomolgus macaques as an infection model  
564 for COVID-19. *Nat Commun* **12**, 1260, doi:10.1038/s41467-021-21389-9 (2021).
- 565 12 Munster, V. J. *et al.* Subtle differences in the pathogenicity of SARS-CoV-2 variants of concern  
566 B.1.1.7 and B.1.351 in rhesus macaques. *Science advances* **7**, eabj3627,  
567 doi:10.1126/sciadv.abj3627 (2021).
- 568 13 Gooch, K. E. *et al.* One or two dose regimen of the SARS-CoV-2 synthetic DNA vaccine INO-  
569 4800 protects against respiratory tract disease burden in nonhuman primate challenge model.  
570 *Vaccine* **39**, 4885-4894, doi:10.1016/j.vaccine.2021.06.057 (2021).
- 571 14 Muñoz-Fontela, C. *et al.* Animal models for COVID-19. *Nature* **586**, 509-515,  
572 doi:10.1038/s41586-020-2787-6 (2020).
- 573 15 Chan, J. F.-W. *et al.* Simulation of the clinical and pathological manifestations of Coronavirus  
574 Disease 2019 (COVID-19) in golden Syrian hamster model: implications for disease  
575 pathogenesis and transmissibility. *Clinical infectious diseases : an official publication of the*  
576 *Infectious Diseases Society of America*, ciaa325, doi:10.1093/cid/ciaa325 (2020).
- 577 16 Sia, S. F. *et al.* Pathogenesis and transmission of SARS-CoV-2 in golden hamsters. *Nature* **583**,  
578 834-838, doi:10.1038/s41586-020-2342-5 (2020).
- 579 17 Osterrieder, N. *et al.* Age-Dependent Progression of SARS-CoV-2 Infection in Syrian Hamsters.  
580 *Viruses* **12**, doi:10.3390/v12070779 (2020).
- 581 18 Song, Z. *et al.* SARS-CoV-2 Causes a Systemically Multiple Organs Damages and Dissemination  
582 in Hamsters. *Front Microbiol* **11**, 618891, doi:10.3389/fmicb.2020.618891 (2020).

- 583 19 Rosenke, K. *et al.* Defining the Syrian hamster as a highly susceptible preclinical model for  
584 SARS-CoV-2 infection. *Emerging microbes & infections* **9**, 2673-2684,  
585 doi:10.1080/22221751.2020.1858177 (2020).
- 586 20 Abdelnabi, R. *et al.* Comparing infectivity and virulence of emerging SARS-CoV-2 variants in  
587 Syrian hamsters. *EBioMedicine* **68**, 103403-103403, doi:10.1016/j.ebiom.2021.103403 (2021).
- 588 21 Imai, M. *et al.* Syrian hamsters as a small animal model for SARS-CoV-2 infection and  
589 countermeasure development. **117**, 16587-16595, doi:10.1073/pnas.2009799117 %J  
590 Proceedings of the National Academy of Sciences (2020).
- 591 22 Ye, Z. W. *et al.* Beneficial effect of combinational methylprednisolone and remdesivir in  
592 hamster model of SARS-CoV-2 infection. *Emerging microbes & infections* **10**, 291-304,  
593 doi:10.1080/22221751.2021.1885998 (2021).
- 594 23 Kreye, J. *et al.* A Therapeutic Non-self-reactive SARS-CoV-2 Antibody Protects from Lung  
595 Pathology in a COVID-19 Hamster Model. *Cell* **183**, 1058-1069.e1019,  
596 doi:10.1016/j.cell.2020.09.049 (2020).
- 597 24 Huo, J. *et al.* A potent SARS-CoV-2 neutralising nanobody shows therapeutic efficacy in the  
598 Syrian golden hamster model of COVID-19. *Nat Commun* **12**, 5469, doi:10.1038/s41467-021-  
599 25480-z (2021).
- 600 25 Liu, X. *et al.* A single intranasal dose of a live-attenuated parainfluenza virus-vectored SARS-  
601 CoV-2 vaccine is protective in hamsters. *Proc Natl Acad Sci U S A* **118**,  
602 doi:10.1073/pnas.2109744118 (2021).
- 603 26 Tostanoski, L. H. *et al.* Immunity elicited by natural infection or Ad26.COV2.S vaccination  
604 protects hamsters against SARS-CoV-2 variants of concern. *Science translational medicine* **13**,  
605 eabj3789, doi:10.1126/scitranslmed.abj3789 (2021).
- 606 27 Fischer, R. J. *et al.* ChAdOx1 nCoV-19 (AZD1222) protects Syrian hamsters against SARS-CoV-2  
607 B.1.351 and B.1.1.7. *Nat Commun* **12**, 5868, doi:10.1038/s41467-021-26178-y (2021).
- 608 28 O'Donnell, K. L. *et al.* Pathogenic and transcriptomic differences of emerging SARS-CoV-2  
609 variants in the Syrian golden hamster model. *EBioMedicine* **73**, 103675,  
610 doi:10.1016/j.ebiom.2021.103675 (2021).
- 611 29 Liu, Y. *et al.* The N501Y spike substitution enhances SARS-CoV-2 infection and transmission.  
612 *Nature*, doi:10.1038/s41586-021-04245-0 (2021).
- 613 30 Mohandas, S. *et al.* SARS-CoV-2 Delta Variant Pathogenesis and Host Response in Syrian  
614 Hamsters. *Viruses* **13**, doi:10.3390/v13091773 (2021).
- 615 31 Mok, B. W. *et al.* Low dose inocula of SARS-CoV-2 Alpha variant transmits more efficiently than  
616 earlier variants in hamsters. *Communications biology* **4**, 1102, doi:10.1038/s42003-021-  
617 02640-x (2021).
- 618 32 Liu, Y. *et al.* Distinct neutralizing kinetics and magnitudes elicited by different SARS-CoV-2  
619 variant spikes. *bioRxiv*, doi:10.1101/2021.09.02.458740 (2021).
- 620 33 CEPI. *CEPI Agility Programme*, <[https://epi.tghn.org/covax-overview/enabling-](https://epi.tghn.org/covax-overview/enabling-sciences/agility_epi/)  
621 [sciences/agility\\_epi/](https://epi.tghn.org/covax-overview/enabling-sciences/agility_epi/)> (2021).
- 622 34 Khoury, D. S. *et al.* Neutralizing antibody levels are highly predictive of immune protection  
623 from symptomatic SARS-CoV-2 infection. *Nat Med* **27**, 1205-1211, doi:10.1038/s41591-021-  
624 01377-8 (2021).
- 625 35 Caly, L. *et al.* Isolation and rapid sharing of the 2019 novel coronavirus (SARS-CoV-2) from the  
626 first patient diagnosed with COVID-19 in Australia. **n/a**, doi:10.5694/mja2.50569.
- 627 36 Nabel, K. G. *et al.* Structural basis for continued antibody evasion by the SARS-CoV-2 receptor  
628 binding domain. **0**, eabl6251, doi:doi:10.1126/science.abl6251.
- 629 37 Andreano, E. & Rappuoli, R. SARS-CoV-2 escaped natural immunity, raising questions about  
630 vaccines and therapies. *Nat Med* **27**, 759-761, doi:10.1038/s41591-021-01347-0 (2021).
- 631 38 De Angelis, M. L. *et al.* Repeated Exposure to Subinfectious Doses of SARS-CoV-2 May Promote  
632 T Cell Immunity and Protection against Severe COVID-19. *Viruses* **13**, 961,  
633 doi:10.3390/v13060961 (2021).

- 634 39 Lee, C. Y. *et al.* Human neutralising antibodies elicited by SARS-CoV-2 non-D614G variants  
635 offer cross-protection against the SARS-CoV-2 D614G variant. *Clinical & translational*  
636 *immunology* **10**, e1241, doi:10.1002/cti2.1241 (2021).
- 637 40 Liu, Y. *et al.* Neutralizing Activity of BNT162b2-Elicited Serum. *The New England journal of*  
638 *medicine* **384**, 1466-1468, doi:10.1056/NEJMc2102017 (2021).
- 639 41 Wu, K. *et al.* Serum Neutralizing Activity Elicited by mRNA-1273 Vaccine. *The New England*  
640 *journal of medicine* **384**, 1468-1470, doi:10.1056/NEJMc2102179 (2021).
- 641 42 Wang, G. L. *et al.* Susceptibility of Circulating SARS-CoV-2 Variants to Neutralization. *N Engl J*  
642 *Med* **384**, 2354-2356, doi:10.1056/NEJMc2103022 (2021).
- 643 43 Supasa, P. *et al.* Reduced neutralization of SARS-CoV-2 B.1.1.7 variant by convalescent and  
644 vaccine sera. *Cell* **184**, 2201-2211.e2207, doi:10.1016/j.cell.2021.02.033 (2021).
- 645 44 Ferguson, N., Ghani, A., Hinsley, W. & Volz, E. Report 50: Hospitalisation risk for Omicron cases  
646 in England. Report No. 50, (Imperial College London, 2021).
- 647 45 Wolter, N. *et al.* Early assessment of the clinical severity of the SARS-CoV-2 Omicron variant  
648 in South Africa. *medRxiv*, 2021.2012.2021.21268116, doi:10.1101/2021.12.21.21268116  
649 (2021).
- 650 46 Zhang, X. *et al.* SARS-CoV-2 Omicron strain exhibits potent capabilities for immune evasion  
651 and viral entrance. *Signal transduction and targeted therapy* **6**, 430, doi:10.1038/s41392-021-  
652 00852-5 (2021).
- 653 47 Kannan, S. R. *et al.* Omicron SARS-CoV-2 variant: Unique features and their impact on pre-  
654 existing antibodies. *Journal of autoimmunity* **126**, 102779, doi:10.1016/j.jaut.2021.102779  
655 (2021).
- 656 48 Lewandowski, K. *et al.* Metagenomic Nanopore Sequencing of Influenza Virus Direct from  
657 Clinical Respiratory Samples. *Journal of Clinical Microbiology* **58**, e00963-00919,  
658 doi:10.1128/JCM.00963-19 (2019).
- 659 49 Bewley, K. R. *et al.* Quantification of SARS-CoV-2 neutralizing antibody by wild-type plaque  
660 reduction neutralization, microneutralization and pseudotyped virus neutralization assays.  
661 *Nature protocols* **16**, 3114-3140, doi:10.1038/s41596-021-00536-y (2021).
- 662 50 Brown, E. P. *et al.* High-throughput, multiplexed IgG subclassing of antigen-specific antibodies  
663 from clinical samples. *J Immunol Methods* **386**, 117-123, doi:10.1016/j.jim.2012.09.007  
664 (2012).
- 665 51 Alexander, F. *et al.* Generation of a Universal Human Complement Source by Large-Scale  
666 Depletion of IgG and IgM from Pooled Human Plasma. *Methods in molecular biology (Clifton,*  
667 *N.J.)* **2414**, 341-362, doi:10.1007/978-1-0716-1900-1\_18 (2022).

668

669

670 **Figures & Tables**

671

672 **Table 1 Study Design**

| Challenge<br>VIC01 | Re-challenge        |                                                          |         |
|--------------------|---------------------|----------------------------------------------------------|---------|
|                    |                     | VIC01                                                    | Omicron |
| <b>5E+04</b>       | m (n=3)             | Each<br>group split<br>at day 50<br>for re-<br>challenge | m (n=1) |
|                    | f (n=3)             |                                                          | f (n=2) |
| <b>5E+03</b>       | m (n=3)             |                                                          | m (n=2) |
|                    | f (n=3)             |                                                          | f (n=1) |
| <b>5E+02</b>       | m (n=3)             |                                                          | m (n=1) |
|                    | f (n=3)             |                                                          | f (n=2) |
| <b>1E+01</b>       | m (n=3)             |                                                          | m (n=2) |
|                    | f (n=3)             |                                                          | f (n=1) |
|                    | Control<br>hamsters |                                                          | m (n=3) |
|                    |                     |                                                          | f (n=3) |
|                    |                     |                                                          | m (n=2) |
|                    |                     |                                                          | f (n=1) |
|                    |                     |                                                          | m (n=1) |
|                    |                     |                                                          | f (n=2) |
|                    |                     |                                                          | m (n=2) |
|                    |                     |                                                          | f (n=1) |

673 m = male, f = female

674

675 **Table 2 Clinical Scoring System**

| Clinical Sign                                                         | Score |
|-----------------------------------------------------------------------|-------|
| Healthy                                                               | 0     |
| Lethargic                                                             | 1     |
| Eyes Shut                                                             | 1     |
| Behavioural Change                                                    | 1     |
| Sunken Eyes                                                           | 2     |
| Ruffled                                                               | 2     |
| Wasp Waisted                                                          | 3     |
| Coughing                                                              | 3     |
| Dehydrated                                                            | 3     |
| Hunched                                                               | 3     |
| Laboured Breathing (1) - occasional catch or skip in breathing rate   | 5     |
| Laboured Breathing (2) - abdominal effort with breathing difficulties | 7     |

676

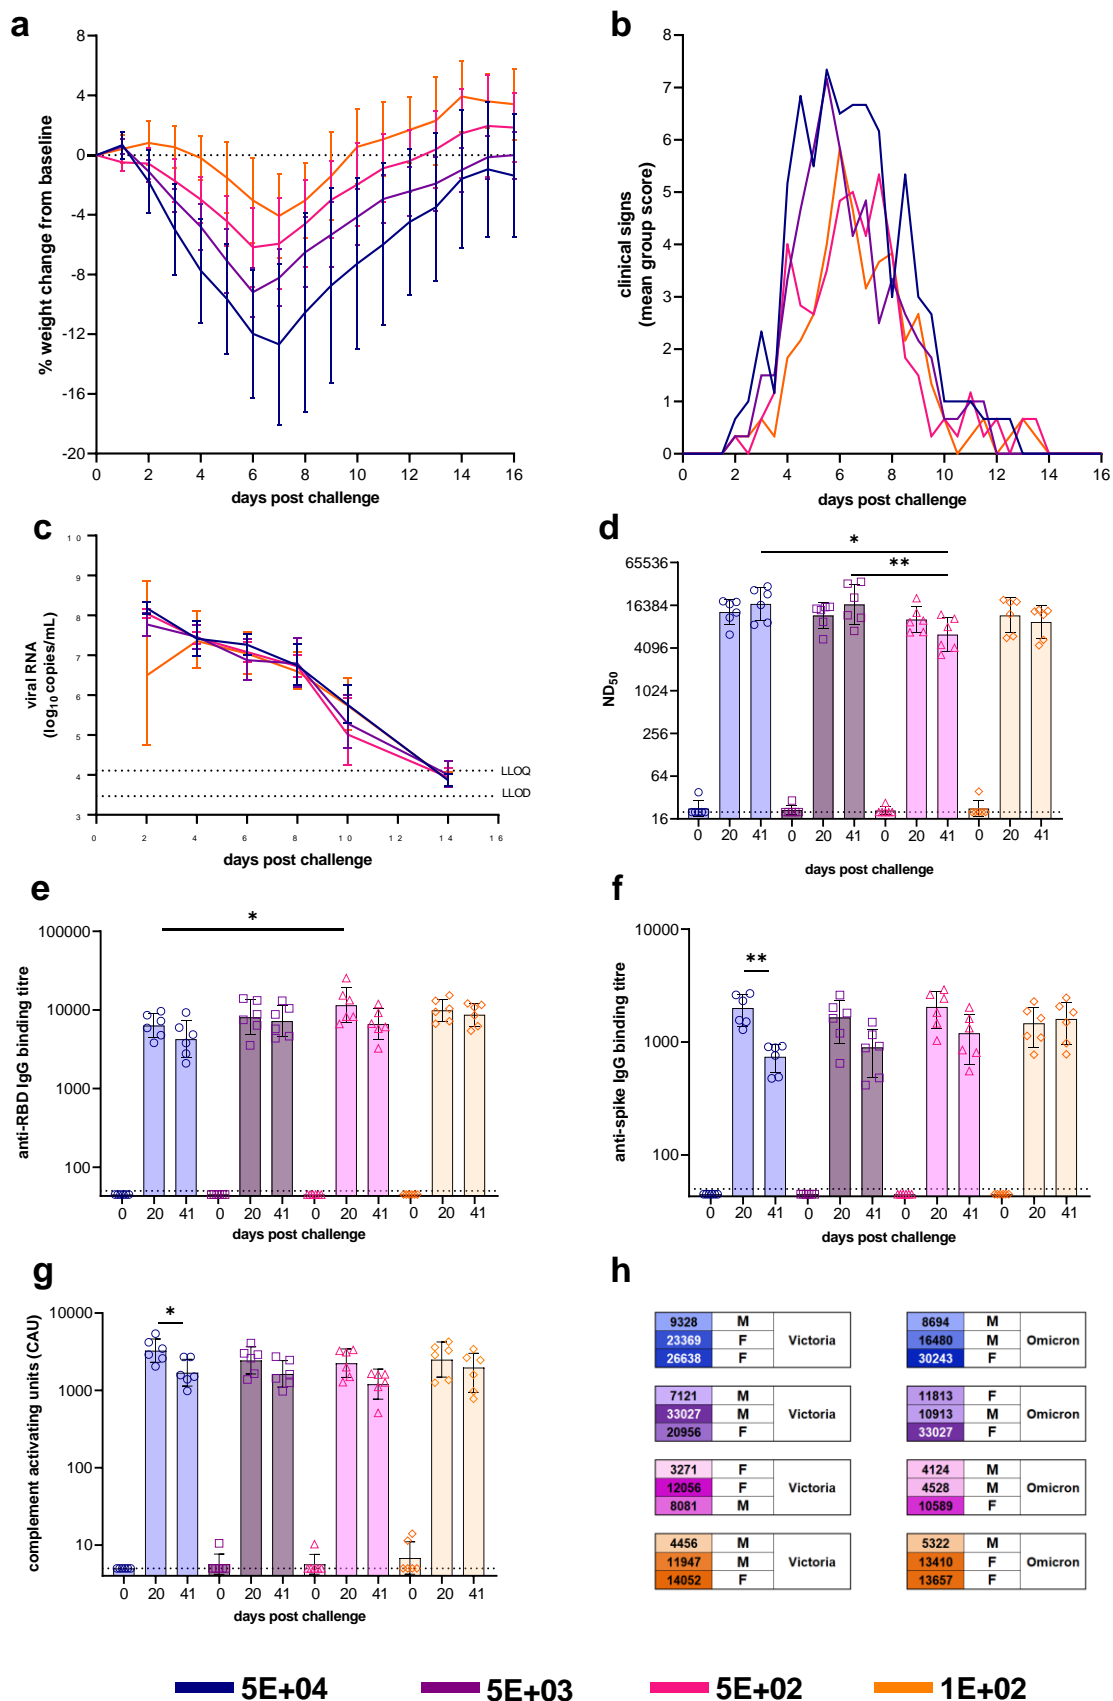

677

678 **Figure 1. Dose Ranging with VIC01.** Hamsters were monitored for (a) weight change  
679 (lines represent group means, error bars represent standard deviation) and (b) clinical  
680 signs (lines represent group means) following challenge with VIC01. Hamsters  
681 challenged with  $5E+04$  lost significantly more weight overall (area under curve) than  
682 hamsters challenged with  $5E+02$  ( $P=0.0146$ ) and  $1E+02$  ( $P=0.0058$ ). Throat swabs  
683 were collected at days 2, 4, 6, 8 10 and 14 for all virus challenged groups. (c) Total  
684 viral RNA was quantified by RT-qPCR at all sample timepoints. Lines show group  
685 geometric means, error bars represent standard deviation. The dashed horizontal lines  
686 show the lower limit of quantification (LLOQ) and the lower limit of detection (LLOD).  
687 Hamsters underwent gingival bleeds for sera at baseline, 20 and 41 days post  
688 challenge for assessment of the humoral response. (d) Neutralising antibody titres, (e)  
689 SARS-CoV-2 RBD-specific IgG binding antibodies, (f) SARS-CoV-2 spike-specific IgG  
690 binding antibodies and (g) SARS-CoV-2 spike-specific antibody dependent  
691 complement deposition were assessed in challenged hamsters at baseline, day 20  
692 and day 41 post challenge. Bars represent group means and error bars represent  
693 standard deviation. All statistical analysis between groups was carried out using one-  
694 way ANOVA with Tukey's correction. The dashed horizontal lines represent the lower  
695 limit of quantification (LLOQ) of the assays. (h) At 50 days post challenge hamsters,  
696 each dose group was split into three and re-challenged with either VIC01 or Omicron.  
697 Numbers neutralising antibodies ( $ND_{50}$ ) titres at day 41 post challenge. Males and  
698 females were split equally between the VIC01 and Omicron re-challenge groups.  
699 Groups are identified according to their 'target' dose.

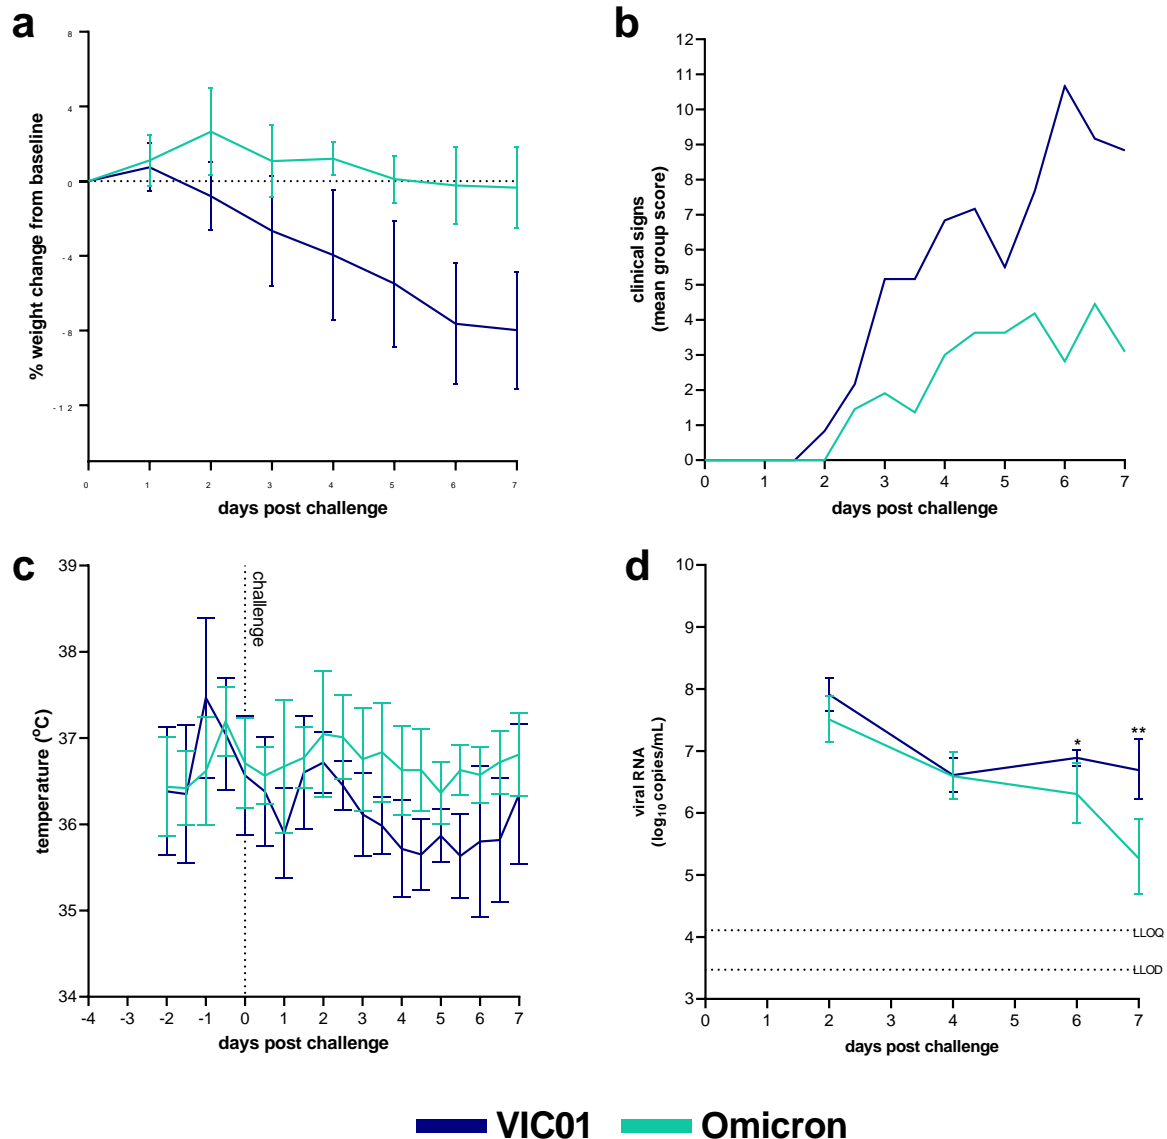

700

701 **Figure 2. Omicron and VIC01 Challenge in naïve hamsters.** Hamsters were  
702 monitored for (a) weight change, (b) clinical signs and (c) temperature following  
703 challenge with VIC01 or the Omicron variant. Hamsters challenged with VIC01  
704 experienced significantly more total weight loss (area under the curve,  $P=0.0007$ ) than  
705 hamsters challenged with Omicron. Throat swabs were collected at days 2, 4, 6 and  
706 7 for all virus challenged groups. (d) Viral RNA was quantified by RT-qPCR at all  
707 sample timepoints. Lines show group geometric means, error bars represent standard  
708 deviation. The dashed horizontal lines show the lower limit of quantification (LLOQ)

709 and the lower limit of detection (LLOD). At day 6 and day 7 Omicron challenged  
710 hamsters shed significantly less virus ( $P=0.0136$  and  $P=0.0012$  respectively) than  
711 hamsters infected with VIC01. There was no significant difference between total  
712 amount of viral RNA shed.

713

714

715

716

717

718

719

720

721

722

723

724

725

726

727

728



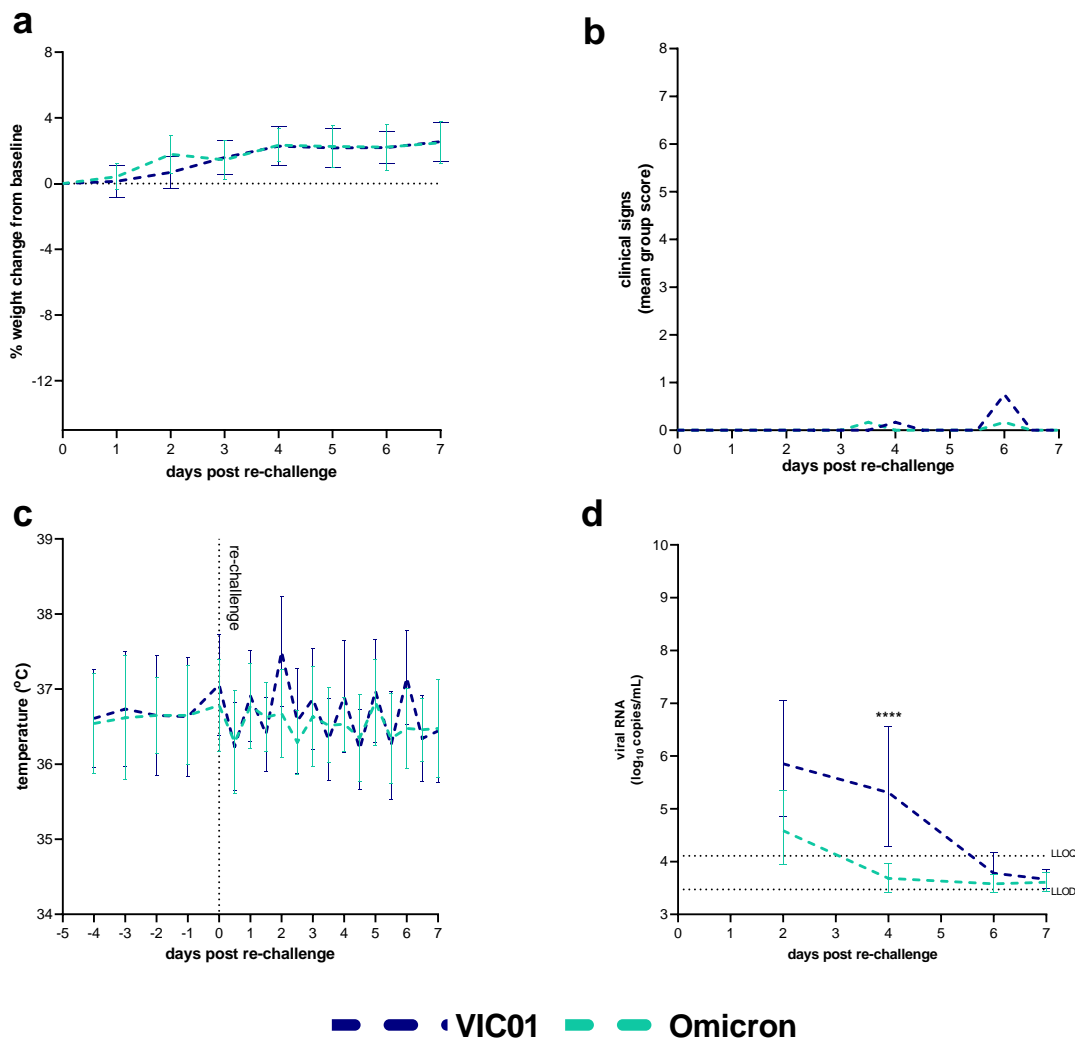

729

730 **Figure 3. Re-challenge of hamsters with SARS-CoV-2** Hamsters were monitored  
731 for (a) weight change (b) clinical signs and (c) temperature following challenge with  
732 VIC01 or the Omicron variant. Throat swabs were collected at days 2, 4, 6 and 7 for  
733 all virus challenged groups. (d) Viral RNA was quantified by RT-qPCR at all sample  
734 timepoints. Lines show group geometric means, error bars represent standard  
735 deviation. The dashed horizontal lines show the lower limit of quantification (LLOQ)  
736 and the lower limit of detection (LLOD).
